# Supplementary material
Source: Research Square preprint supplement (doi:10.21203/rs.3.rs-9335632/v1)
Supplement: Supplementary file 1 [file 63946a4148729abe90a8fc53.pdf]

# **Intracellular Ca<sup>2+</sup> Capacitors for Spatial Signaling Reprogramming: Adaptive Rectification of Metabolic Circuits**

Pengfei Tian<sup>1,8</sup>, Jun Gao<sup>1,8</sup>, Yueqing Wang<sup>1,8</sup>, Muyan Qin<sup>1</sup>, Jiangtao Zhong<sup>5</sup>, Fang Qiu<sup>3</sup>, Chunyu Liu<sup>1</sup>, Hanchao Gao<sup>4</sup>, Yang Lu<sup>1</sup>, Kun Su<sup>1</sup>, Da qian Liu<sup>1</sup>, Liqiu Hu<sup>1</sup>, Jie Jiang<sup>7</sup>, Ping Du<sup>1,\*</sup>, Limin Zhao<sup>2,\*</sup>, Haobo Pan<sup>1,6,\*</sup>

1. Shenzhen Key Laboratory of Marine Biomedical Materials, CAS-HK Joint Lab of Biomaterials, The Key Laboratory of Biomedical Imaging Science and System, Shenzhen Institutes of Advanced Technology, Chinese Academy of Sciences, Shenzhen, 518055, PR China

2 Geriatric Medicine Department & General Medicine Department, Shenzhen Longhua District Central Hospital, The affiliated Longhua Hospital of Shenzhen University, Shenzhen, 518000, PR China

3. Department of Burn and Plastic Surgery, Shenzhen Longhua District Central Hospital, Shenzhen, 518000, PR China

4. Department of Nephrology, Shenzhen Longhua District Central Hospital The affiliated Longhua Hospital of Shenzhen University, 518107, China.

5. Department of Orthopaedics, The Seventh Affiliated Hospital, Sun Yat-sen University, Shenzhen, Guangdong Province, 518107, China.

6. Shenzhen Healthemes Biotechnology Co. Ltd, Shenzhen, 518102, PR China

7. Shenzhen University of Advanced Technology General Hospital, Shenzhen, 518055, PR China.

<sup>8</sup> These authors contributed equally: Pengfei Tian, Jun Gao, Kun Su.

\* Corresponding author Ping Du (ping.du@siat.ac.cn), Limin Zhao (lm.zhao@siat.ac.cn), Haobo Pan, (hb.pan@siat.ac.cn)

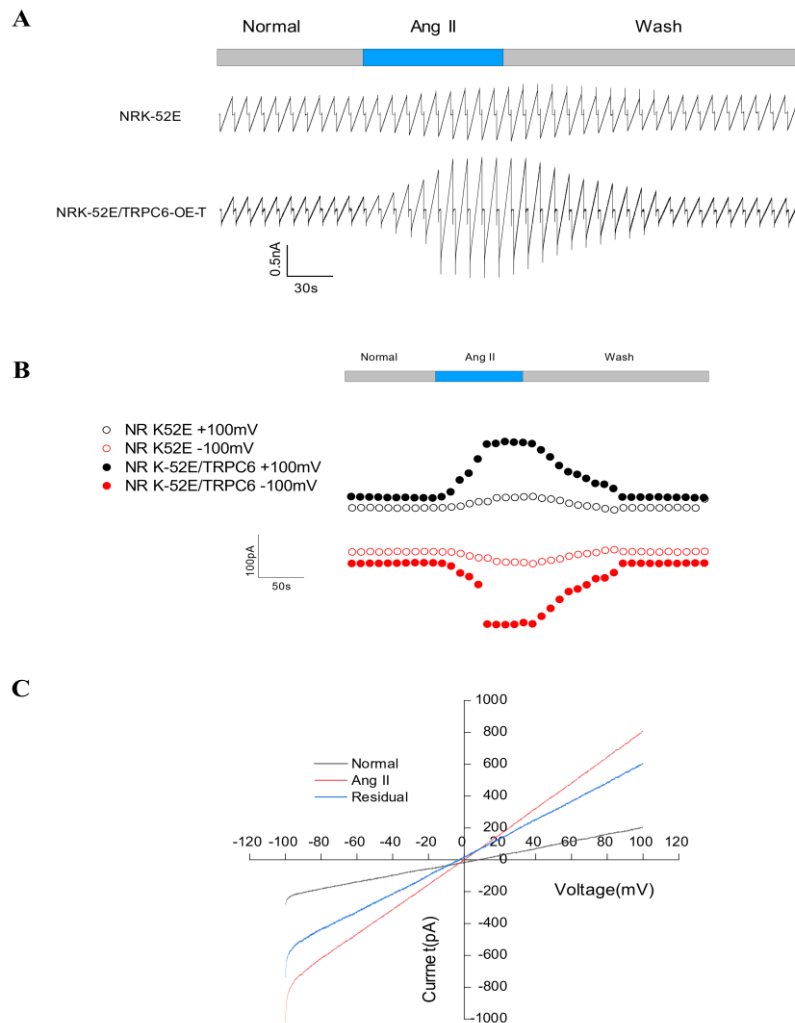

**Figure S1. Effects of Ang II on Ionic Currents in NRK-52E/TRPC6 Cells.** (A) Representative time courses of ramp currents in cells transfected with empty vector or TRPC6. (B) Scatter plots showing ramp current amplitudes at -100 mV and +100 mV in empty vector and TRPC6 groups. (C) Representative current traces of TRPC6-transfected cells under basal conditions, after AngII stimulation, and the net TRPC6 current obtained by subtraction.

Whole-cell patch-clamp recordings were performed to measure currents evoked by 1.0  $\mu$ M angiotensin II (AngII). The voltage stimulus protocol consisted of a holding potential of  $-50$  mV, from which voltage ramps spanning  $-100$  mV to  $+100$  mV over 1 s were applied to record whole-cell currents; ramp stimuli were delivered every 10 s for a total of 40 consecutive sweeps. Recordings were systematically divided into four sequential phases: sweeps 1 – 10 were acquired under standard intra- and extracellular solution conditions to establish a stable baseline current; sweeps 11–20 were used to monitor current changes induced by intracellular application of AngII



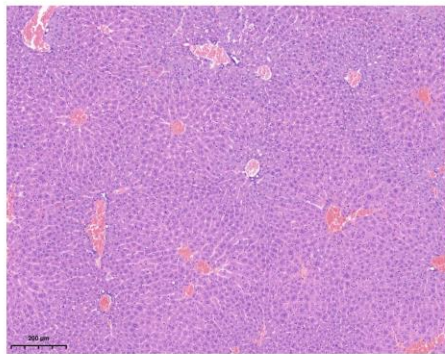

**liver**

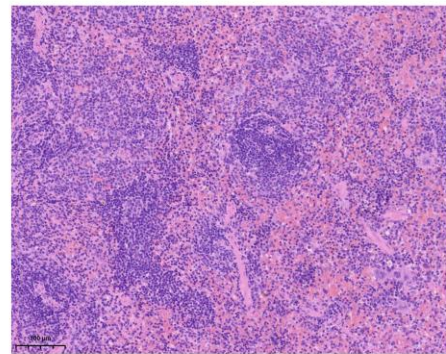

**spleen**

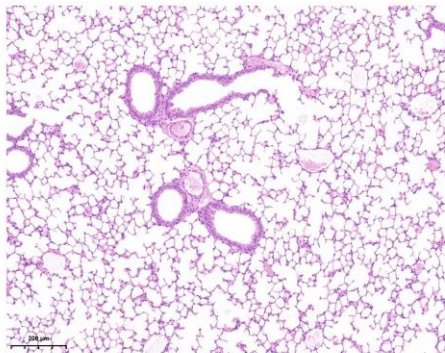

**lung**

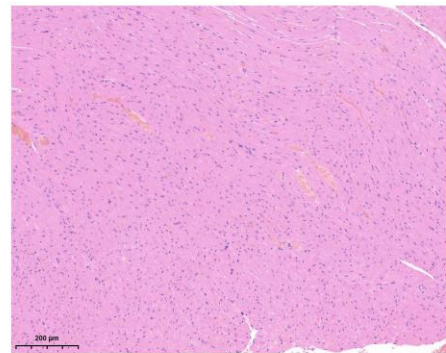

**Heart**

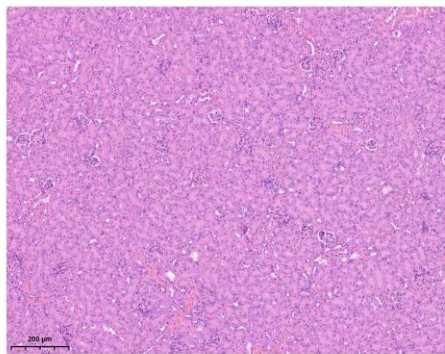

**kidney**

**Figure S3. H&E staining of major organs (heart, liver, spleen, lung, and kidney) after intravenous injection of icacap.**

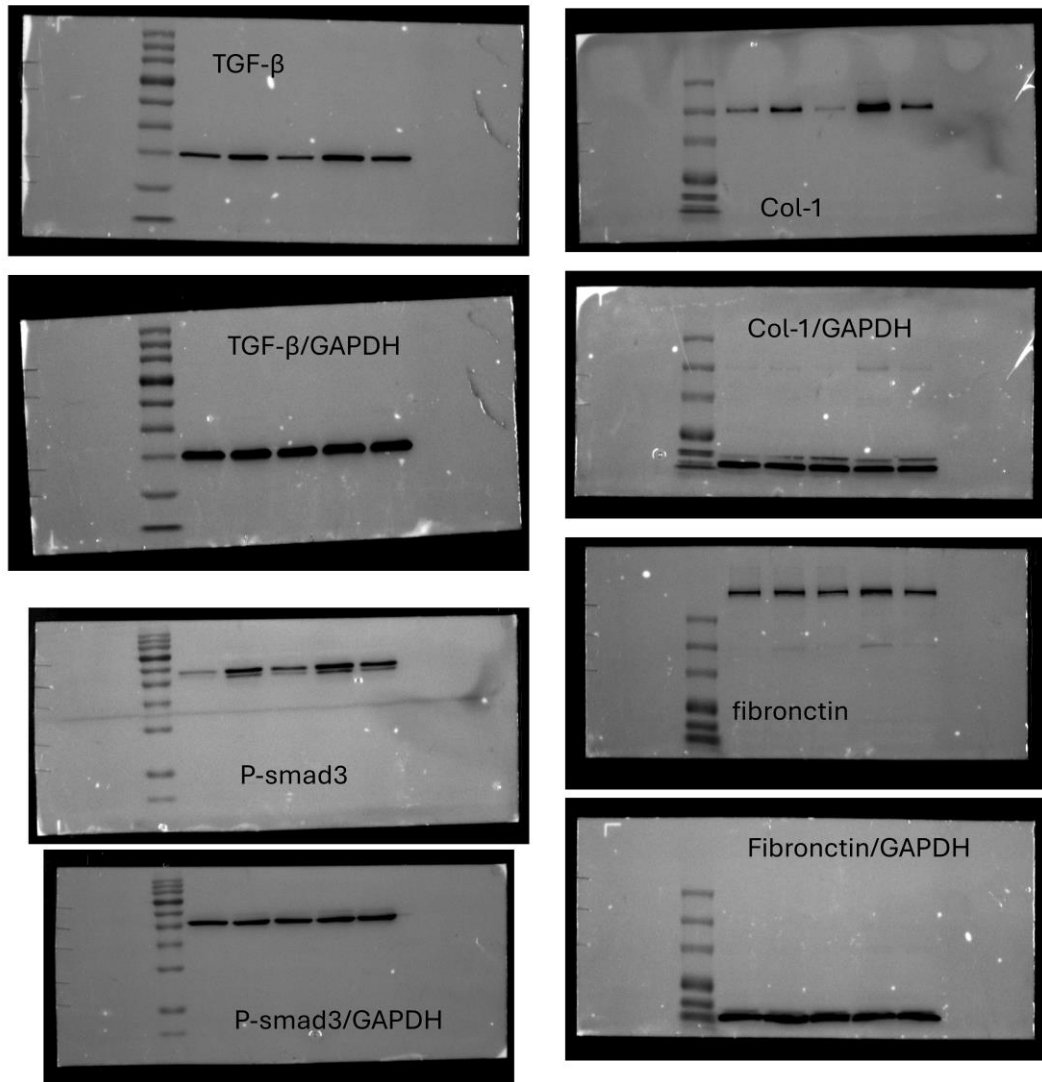

**Figure S4. original western blot images.**

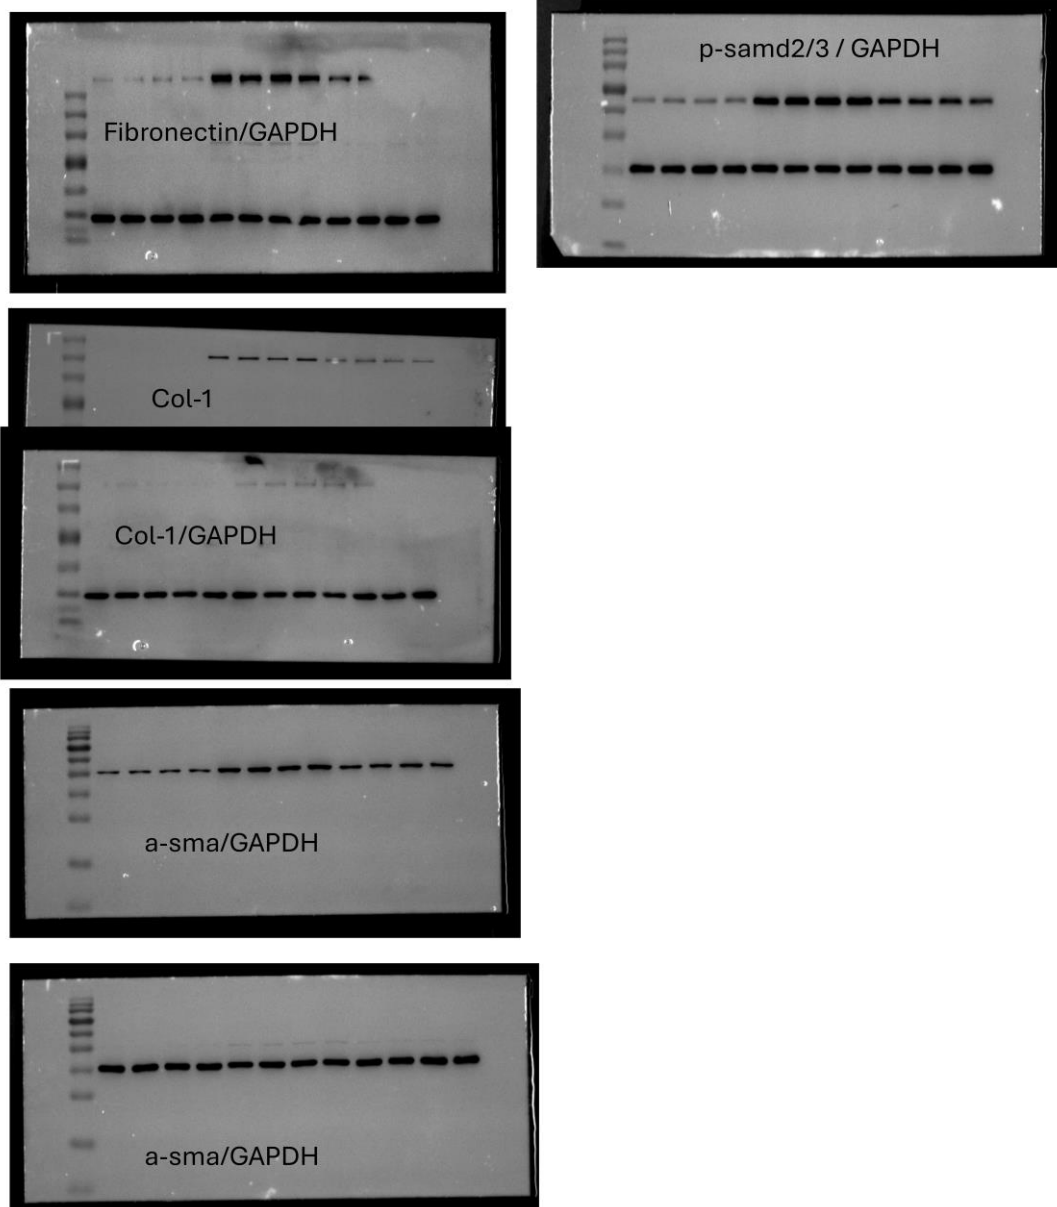

**Figure S5. original western blot images.**

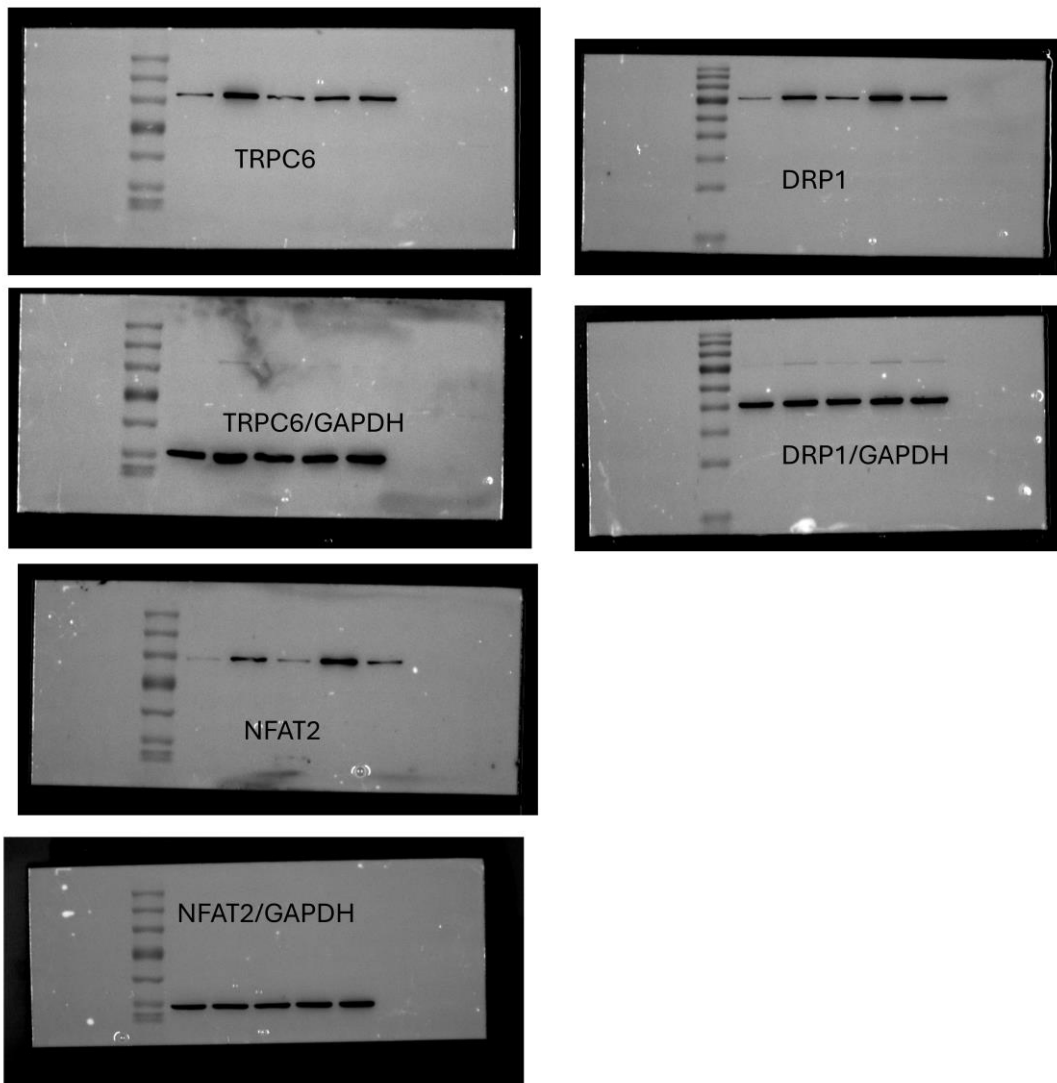

**Figure S6. original western blot images.**

| Antibody     | Manufacturer | Cat. No.  |
|--------------|--------------|-----------|
| TRPC6        | Thermo       | PA5-20256 |
| NFAT2        | Thermo       | PA5-90432 |
| Fibronectin  | Thermo       | PA5-29578 |
| TGF- $\beta$ | Thermo       | MA5-53830 |
| Collagen-1   | Thermo       | PA5-29569 |
| Smad-3       | thermo       | MA5-35269 |

**Table S1. Primary antibodies used in this study.**
